# Supplementary material
Source: PubMed Central journal article supplement (PMC5204159)
Supplement: rspb20161319supp1.pdf [file rspb20161319supp1.pdf]

## ELECTRONIC SUPPLEMENTARY MATERIAL

Gómez-Robles A, Hopkins WD, Schapiro SJ, Sherwood CC. 2016 The heritability of chimpanzee and human brain asymmetry. *Proceedings of the Royal Society B* 20161319. <http://dx.doi.org/10.1098/rspb.2016.1319>

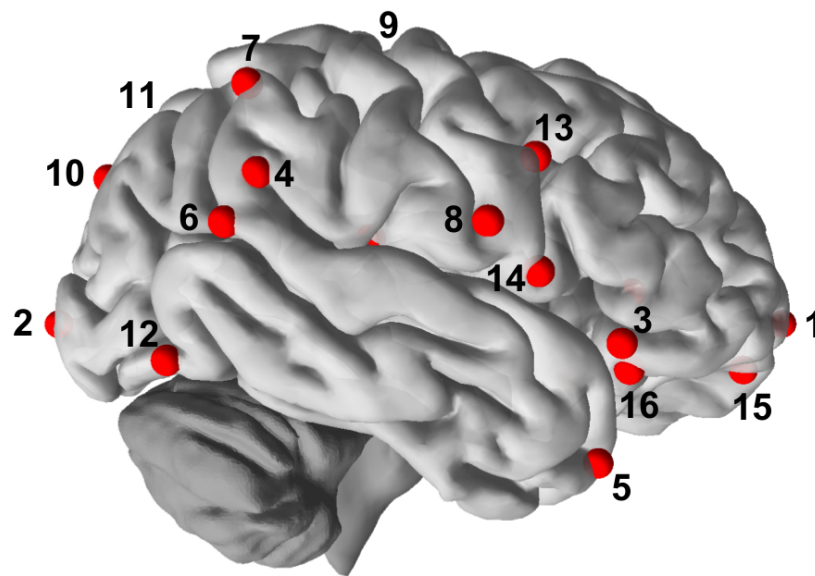

**Figure 1.** Anatomically homologous landmarks used in this study overlaid on a human brain.

**Table S1.** Definition of anatomical landmarks.

| <b>Landmark</b> | <b>Definition</b>                                                                                                                                                                   |
|-----------------|-------------------------------------------------------------------------------------------------------------------------------------------------------------------------------------|
| <b>1</b>        | Frontal pole                                                                                                                                                                        |
| <b>2</b>        | Occipital pole                                                                                                                                                                      |
| <b>3</b>        | Anterior end of the Sylvian fissure (defined on the pars orbitalis in humans)                                                                                                       |
| <b>4</b>        | Posterior end of the Sylvian fissure (following the main course of the fissure when the terminal segment is divided)                                                                |
| <b>5</b>        | Anterior end of the superior temporal sulcus (close to the temporal pole)                                                                                                           |
| <b>6</b>        | Inflection point between the horizontal segment and the ascending segment of the superior temporal sulcus                                                                           |
| <b>7</b>        | Most posterior and superior point of the superior temporal sulcus (located between the supramarginal gyrus and the angular gyrus)                                                   |
| <b>8</b>        | Inferior termination of the central sulcus                                                                                                                                          |
| <b>9</b>        | Superior termination of the central sulcus (intersection between the central sulcus and the midline)                                                                                |
| <b>10</b>       | In chimpanzees: intersection between the intraparietal sulcus and the lunate sulcus<br>In humans: intersection between the intraparietal sulcus and the transverse occipital sulcus |
| <b>11</b>       | In chimpanzees: intersection of the lunate sulcus with the midline<br>In humans: intersection of the parieto-occipital sulcus with the midline                                      |
| <b>12</b>       | In chimpanzees: most inferior and lateral point of the lunate sulcus<br>In humans: occipital notch                                                                                  |
| <b>13</b>       | Intersection of the inferior frontal sulcus with the precentral sulcus                                                                                                              |
| <b>14</b>       | Inferior end of the precentral sulcus                                                                                                                                               |
| <b>15</b>       | In chimpanzees: superior end of the fronto-orbital sulcus<br>In humans: anterior end of the latero-orbital sulcus                                                                   |
| <b>16</b>       | In chimpanzees: inferior end of the fronto-orbital sulcus<br>In humans: posterior end of the latero-orbital sulcus                                                                  |

**Table S2.** Definition of interlandmark distances.

| <b>Lobe proportions</b>                                    |                                  |
|------------------------------------------------------------|----------------------------------|
| <b>Variable</b>                                            | <b>Defined between landmarks</b> |
| <b>Superior frontal length (SF)</b>                        | 1 and 9                          |
| <b>Inferior frontal length (IF)</b>                        | 1 and 8                          |
| <b>Temporal length (T)</b>                                 | 5 and 10                         |
| <b>Superior parietal length (SP)</b>                       | 9 and 11                         |
| <b>Inferior parietal length (IP)</b>                       | 8 and 10                         |
| <b>Occipital length (O)</b>                                | 2 and 11                         |
| <b>Sulcal lengths</b>                                      |                                  |
| <b>Variable</b>                                            | <b>Defined between landmarks</b> |
| <b>Fronto-orbital (FOS) or latero-orbital sulcus (LOS)</b> | 15 and 16                        |
| <b>Precentral sulcus (PCS)</b>                             | 13 and 14                        |
| <b>Central sulcus (CS)</b>                                 | 8 and 9                          |
| <b>Sylvian fissure (SyF)</b>                               | 3 and 4                          |
| <b>Superior temporal sulcus (STS)</b>                      | 5 and 6, plus 6 and 7            |
| <b>Lunate (LS) or parieto-occipital sulcus (POS)</b>       | 10 and 11, plus 10 and 12        |

**Table S3.** Heritability of lobe proportions in chimpanzees

| Left      |             |           |                    |              | Right       |           |                    |                      |
|-----------|-------------|-----------|--------------------|--------------|-------------|-----------|--------------------|----------------------|
|           | $h^2$       | HPDI      | $\Delta$ DIC (P)   | Fixed        | $h^2$       | HPDI      | $\Delta$ DIC (P)   | Fixed                |
| <b>SF</b> | <b>0.45</b> | 0.20-0.70 | 49.88<br>(0.003)   | scan         | <b>0.55</b> | 0.27-0.77 | 71.41<br>(<0.001)  | scan                 |
| <b>IF</b> | <b>0.39</b> | 0.17-0.72 | 48.19<br>(0.004)   | —            | <b>0.62</b> | 0.36-0.87 | 110.04<br>(<0.001) | sex, age,<br>sex*age |
| <b>T</b>  | <b>0.47</b> | 0.20-0.75 | 60.31<br>(0.003)   | scan         | <b>0.58</b> | 0.26-0.80 | 76.36<br>(<0.001)  | scan                 |
| <b>SP</b> | <b>0.63</b> | 0.33-0.82 | 91.23<br>(<0.001)  | sex,<br>scan | <b>0.42</b> | 0.27-0.77 | 69.63<br>(0.001)   | sex, scan            |
| <b>IP</b> | <b>0.65</b> | 0.38-0.86 | 111.56<br>(<0.001) | scan         | <b>0.71</b> | 0.41-0.88 | 136.44<br>(<0.001) | sex                  |
| <b>O</b>  | <b>0.52</b> | 0.28-0.82 | 85.85<br>(<0.001)  | scan         | <b>0.61</b> | 0.28-0.82 | 83.04<br>(<0.001)  | —                    |

$h^2$ : heritability; HPDI: highest posterior density interval;  $\Delta$ DIC (P): difference in the deviance information criterion between the model with and without pedigree information (P-value); Fixed: significant fixed effects. Bold: significant heritability under our simulation-based threshold.

**Table S4.** Heritability of lobe proportions in humans

| Left      |             |           |                    |       | Right       |           |                    |       |
|-----------|-------------|-----------|--------------------|-------|-------------|-----------|--------------------|-------|
|           | $h^2$       | HPDI      | $\Delta$ DIC (P)   | Fixed | $h^2$       | HPDI      | $\Delta$ DIC (P)   | Fixed |
| <b>SF</b> | 0.20        | 0.08-0.39 | 5.04<br>(0.419)    | —     | <b>0.40</b> | 0.15-0.63 | 34.22<br>(0.017)   | —     |
| <b>IF</b> | 0.20        | 0.11-0.49 | 14.03<br>(0.126)   | —     | <b>0.53</b> | 0.27-0.72 | 64.43<br>(<0.001)  | —     |
| <b>T</b>  | <b>0.36</b> | 0.15-0.57 | 29.55<br>(0.024)   | —     | <b>0.64</b> | 0.40-0.80 | 106.38<br>(<0.001) | —     |
| <b>SP</b> | <b>0.40</b> | 0.19-0.66 | 45.46<br>(0.003)   | —     | <b>0.32</b> | 0.13-0.57 | 25.79<br>(0.034)   | —     |
| <b>IP</b> | <b>0.42</b> | 0.18-0.62 | 41.13<br>(0.005)   | —     | <b>0.38</b> | 0.15-0.58 | 29.98<br>(0.024)   | —     |
| <b>O</b>  | <b>0.65</b> | 0.35-0.84 | 101.50<br>(<0.001) | —     | <b>0.52</b> | 0.26-0.73 | 63.01<br>(<0.001)  | —     |

$h^2$ : heritability; HPDI: highest posterior density interval;  $\Delta$ DIC (P): difference in the deviance information criterion between the model with and without pedigree information (P-value); Fixed: significant fixed effects. Bold: significant heritability under our simulation-based threshold.

**Table S5.** Phenotypic and genetic correlations between corresponding left and right lobe proportions.

|           | Chimpanzee              |                         | Human                   |                         |
|-----------|-------------------------|-------------------------|-------------------------|-------------------------|
|           | $\rho_P$ (HPDI)         | $\rho_G$ (HPDI)         | $\rho_P$ (HPDI)         | $\rho_G$ (HPDI)         |
| <b>SF</b> | <b>0.89</b> (0.85-0.91) | <b>0.85</b> (0.72-0.93) | <b>0.67</b> (0.59-0.74) | <b>0.70</b> (0.35-0.87) |
| <b>IF</b> | <b>0.57</b> (0.47-0.66) | <b>0.69</b> (0.36-0.84) | <b>0.30</b> (0.17-0.43) | <b>0.45</b> (0.07-0.73) |
| <b>T</b>  | <b>0.69</b> (0.61-0.76) | <b>0.78</b> (0.57-0.90) | <b>0.46</b> (0.35-0.56) | <b>0.66</b> (0.40-0.81) |
| <b>SP</b> | <b>0.78</b> (0.71-0.83) | <b>0.83</b> (0.64-0.90) | <b>0.64</b> (0.55-0.71) | <b>0.68</b> (0.40-0.87) |
| <b>IP</b> | <b>0.60</b> (0.49-0.67) | <b>0.74</b> (0.54-0.87) | <b>0.35</b> (0.21-0.45) | <b>0.52</b> (0.18-0.76) |
| <b>O</b>  | <b>0.84</b> (0.79-0.88) | <b>0.87</b> (0.70-0.92) | <b>0.72</b> (0.64-0.78) | <b>0.81</b> (0.61-0.89) |

$\rho_P$ : phenotypic correlation;  $\rho_G$ : genetic correlation; HPDI: highest posterior density interval. Bold: significant correlation as indicated by a HPDI that does not include 0.

**Table S6.** Heritability of sulcal lengths in chimpanzees

|            | Left        |           |                  |                   | Right       |           |                  |       |
|------------|-------------|-----------|------------------|-------------------|-------------|-----------|------------------|-------|
|            | $h^2$       | HPDI      | $\Delta$ DIC (P) | Fixed             | $h^2$       | HPDI      | $\Delta$ DIC (P) | Fixed |
| <b>FOS</b> | <b>0.29</b> | 0.15-0.59 | 28.19<br>(0.049) | —                 | <b>0.34</b> | 0.13-0.61 | 29.37<br>(0.044) | —     |
| <b>PCS</b> | 0.25        | 0.10-0.56 | 20.32<br>(0.099) | —                 | 0.27        | 0.10-0.52 | 16.25<br>(0.153) | —     |
| <b>CS</b>  | <b>0.43</b> | 0.18-0.69 | 43.98<br>(0.007) | —                 | <b>0.39</b> | 0.19-0.73 | 52.14<br>(0.003) | scan  |
| <b>SyF</b> | <b>0.38</b> | 0.16-0.62 | 35.69<br>(0.020) | —                 | <b>0.38</b> | 0.19-0.66 | 42.29<br>(0.010) | scan  |
| <b>STS</b> | <b>0.52</b> | 0.19-0.75 | 59.53<br>(0.003) | —                 | <b>0.31</b> | 0.14-0.65 | 32.45<br>(0.030) | —     |
| <b>LS</b>  | 0.32        | 0.13-0.61 | 26.16<br>(0.062) | sex, age,<br>scan | <b>0.34</b> | 0.13-0.64 | 31.72<br>(0.032) | scan  |

$h^2$ : heritability; HPDI: highest posterior density interval;  $\Delta$ DIC (P): difference in the deviance information criterion between the model with and without pedigree information (P-value); Fixed: significant fixed effects. Bold: significant heritability under our simulation-based threshold.

**Table S7.** Heritability of sulcal lengths in humans

|            | Left        |           |                  |                 | Right       |           |                  |       |
|------------|-------------|-----------|------------------|-----------------|-------------|-----------|------------------|-------|
|            | $h^2$       | HPDI      | $\Delta$ DIC (P) | Fixed           | $h^2$       | HPDI      | $\Delta$ DIC (P) | Fixed |
| <b>LOS</b> | 0.19        | 0.07-0.34 | 0.38<br>(0.667)  | —               | 0.21        | 0.10-0.46 | 11.25<br>(0.187) | —     |
| <b>PCS</b> | 0.25        | 0.09-0.45 | 9.84<br>(0.229)  | —               | 0.18        | 0.08-0.38 | 4.19<br>(0.463)  | —     |
| <b>CS</b>  | <b>0.44</b> | 0.16-0.64 | 39.47<br>(0.008) | sex,<br>sex*age | <b>0.45</b> | 0.21-0.63 | 45.32<br>(0.003) | —     |
| <b>SyF</b> | 0.25        | 0.11-0.47 | 16.97<br>(0.090) | —               | <b>0.38</b> | 0.17-0.60 | 33.36<br>(0.018) | —     |
| <b>STS</b> | 0.29        | 0.10-0.46 | 13.48<br>(0.136) | —               | 0.17        | 0.08-0.37 | 3.96<br>(0.475)  | —     |
| <b>POS</b> | <b>0.30</b> | 0.11-0.57 | 22.34<br>(0.047) | —               | 0.20        | 0.10-0.52 | 15.11<br>(0.113) | —     |

$h^2$ : heritability; HPDI: highest posterior density interval;  $\Delta$ DIC (P): difference in the deviance information criterion between the model with and without pedigree information (P-value); Fixed: significant fixed effects. Bold: significant heritability under our simulation-based threshold.

**Table S8.** Phenotypic and genetic correlations between corresponding left and right sulcal lengths.

|                | Chimpanzee              |                         | Human                   |                         |
|----------------|-------------------------|-------------------------|-------------------------|-------------------------|
|                | $\rho_P$ (HPDI)         | $\rho_G$ (HPDI)         | $\rho_P$ (HPDI)         | $\rho_G$ (HPDI)         |
| <b>FOS/LOS</b> | <b>0.33</b> (0.18-0.43) | 0.46 (-0.02-0.73)       | <b>0.25</b> (0.13-0.38) | 0.30 (-0.17-0.66)       |
| <b>PCS</b>     | <b>0.30</b> (0.19-0.43) | 0.41 (-0.15-0.71)       | <b>0.38</b> (0.17-0.41) | 0.31 (-0.16-0.64)       |
| <b>CS</b>      | <b>0.59</b> (0.50-0.68) | <b>0.76</b> (0.42-0.87) | <b>0.34</b> (0.25-0.48) | <b>0.64</b> (0.35-0.80) |
| <b>SyF</b>     | <b>0.48</b> (0.37-0.59) | <b>0.50</b> (0.12-0.75) | <b>0.32</b> (0.19-0.43) | <b>0.55</b> (0.23-0.78) |
| <b>STS</b>     | <b>0.59</b> (0.50-0.67) | <b>0.72</b> (0.38-0.86) | <b>0.24</b> (0.09-0.35) | 0.14 (-0.28-0.56)       |
| <b>LS/POS</b>  | <b>0.59</b> (0.46-0.65) | <b>0.57</b> (0.12-0.80) | <b>0.38</b> (0.25-0.48) | 0.40 (-0.08-0.72)       |

$\rho_P$ : phenotypic correlation;  $\rho_G$ : genetic correlation; HPDI: highest posterior density interval. Bold: significant correlation as indicated by a HPDI that does not include 0.

**Table S9.** Heritability of asymmetry quotients (AQs) for lobe proportions.

|           | Chimpanzees                  |       |           |                  |       | Humans                       |       |           |                  |       |
|-----------|------------------------------|-------|-----------|------------------|-------|------------------------------|-------|-----------|------------------|-------|
|           | AQ (P)                       | $h^2$ | HPDI      | $\Delta$ DIC (P) | Fixed | AQ (P)                       | $h^2$ | HPDI      | $\Delta$ DIC (P) | Fixed |
| <b>SF</b> | 0.18<br>(0.153)              | 0.15  | 0.06-0.38 | 1.46<br>(0.730)  | —     | -0.17<br>(0.352)             | 0.14  | 0.07-0.32 | -1.00<br>(0.737) | —     |
| <b>IF</b> | <b>1.13</b><br>(0.003)       | 0.29  | 0.12-0.59 | 23.27<br>(0.075) | —     | <b>2.71</b><br>( $<0.001$ )  | 0.18  | 0.09-0.44 | 9.24<br>(0.244)  | —     |
| <b>T</b>  | -0.34<br>(0.100)             | 0.16  | 0.07-0.38 | 1.27<br>(0.737)  | —     | -0.39<br>(0.070)             | 0.25  | 0.11-0.47 | 16.32<br>(0.096) | —     |
| <b>SP</b> | <b>1.69</b><br>(0.010)       | 0.23  | 0.09-0.47 | 11.25<br>(0.276) | —     | 0.70<br>(0.201)              | 0.19  | 0.08-0.39 | 3.62<br>(0.488)  | —     |
| <b>IP</b> | <b>-1.67</b><br>( $<0.001$ ) | 0.22  | 0.08-0.46 | 9.30<br>(0.358)  | —     | <b>-3.52</b><br>( $<0.001$ ) | 0.25  | 0.10-0.42 | 9.96<br>(0.227)  | —     |
| <b>O</b>  | <b>-2.62</b><br>(0.001)      | 0.18  | 0.10-0.49 | 11.72<br>(0.265) | —     | 0.52<br>(0.425)              | 0.19  | 0.09-0.44 | 7.63<br>(0.304)  | —     |

AQ (P): Asymmetry quotient in % of total length and P-value testing if AQs are significantly different from 0.  $h^2$ : heritability; HPDI: highest posterior density interval;  $\Delta$ DIC (P): difference in the deviance information criterion between the model with and without pedigree information (P-value); Fixed: significant fixed effects. Bold: AQs that differ significantly from 0. No heritability is significant under our simulation-based threshold.

**Table S10.** Heritability of asymmetry quotients (AQs) for sulcal lengths.

|             | Chimpanzees                  |       |       |                  |                         | Humans                       |       |       |                  |                         |
|-------------|------------------------------|-------|-------|------------------|-------------------------|------------------------------|-------|-------|------------------|-------------------------|
|             | AQ (P)                       | $h^2$ | HPDI  | $\Delta$ DIC (P) | Fixed                   | AQ (P)                       | $h^2$ | HPDI  | $\Delta$ DIC (P) | Fixed                   |
| <b>FOS/</b> | -1.04<br>(0.214)             | 0.22  | 0.08- | 10.17<br>(0.318) | —                       | <b>-6.03</b><br>( $<0.001$ ) | 0.13  | 0.07- | 0.04<br>(0.682)  | —                       |
| <b>LOS</b>  |                              |       | 0.45  |                  |                         |                              |       | 0.34  |                  |                         |
| <b>PCS</b>  | 3.75<br>(0.060)              | 0.23  | 0.09- | 12.09<br>(0.249) | —                       | 0.08<br>(0.949)              | 0.17  | 0.07- | -0.22<br>(0.696) | —                       |
| <b>CS</b>   | -0.36<br>(0.169)             | 0.20  | 0.07- | 2.22<br>(0.688)  | scan                    | -0.65<br>(0.072)             | 0.16  | 0.07- | 0.87<br>(0.639)  | Sex,<br>age,<br>sex*age |
| <b>SyF</b>  | <b>-2.68</b><br>( $<0.001$ ) | 0.27  | 0.12- | 20.89<br>(0.092) | —                       | <b>-7.46</b><br>( $<0.001$ ) | 0.17  | 0.07- | 0.75<br>(0.649)  | —                       |
| <b>STS</b>  | <b>-1.20</b><br>(0.001)      | 0.20  | 0.08- | 5.28<br>(0.524)  | —                       | <b>-4.00</b><br>( $<0.001$ ) | 0.22  | 0.09- | 6.51<br>(0.347)  | —                       |
| <b>LS/</b>  | -0.82<br>(0.130)             | 0.21  | 0.09- | 9.75<br>(0.338)  | sex,<br>age,<br>sex*age | <b>2.02</b><br>( $<0.001$ )  | 0.20  | 0.08- | 6.69<br>(0.341)  | —                       |
| <b>POS</b>  |                              |       | 0.49  |                  |                         |                              |       | 0.43  |                  |                         |

AQ (P): Asymmetry quotient in % of total length and P-value testing if AQs are significantly different from 0.  $h^2$ : heritability; HPDI: highest posterior density interval;  $\Delta$ DIC (P): difference in the deviance information criterion between the model with and without pedigree information

(P-value); Fixed: significant fixed effects. Bold: AOs that differ significantly from 0. No heritability is significant under our simulation-based threshold.

**Table S11.** Heritability of principal components of asymmetric shape variation in chimpanzees, which represent major patterns of asymmetric variation in the sample.

|            | % var | DA $\alpha$  | $h^2$ | HPDI      | $\Delta$ DIC (P) | Fixed                   |
|------------|-------|--------------|-------|-----------|------------------|-------------------------|
| <b>PC1</b> | 13.07 | 85.52        | 0.21  | 0.08-0.44 | 6.77 (0.457)     | —                       |
| <b>PC2</b> | 9.69  | <b>64.71</b> | 0.17  | 0.09-0.42 | 8.83 (0.378)     | —                       |
| <b>PC3</b> | 7.70  | <b>76.25</b> | 0.18  | 0.07-0.39 | 1.89 (0.706)     | sex, age, sex*age, scan |
| <b>PC4</b> | 6.95  | 84.97        | 0.16  | 0.06-0.37 | 0.36 (0.780)     | —                       |
| <b>PC5</b> | 5.62  | 86.52        | 0.24  | 0.10-0.53 | 15.37 (0.168)    | —                       |

% var: percentage of variance explained by each principal component; DA  $\alpha$ : angle formed between each eigenvector and the directional asymmetry vector (values closer to 0° indicate a stronger relationship, and values closer to 90° indicate total dissimilarity; 78.42° is the significance threshold above which vectors are considered unrelated);  $h^2$ : heritability; HPDI: highest posterior density interval;  $\Delta$ DIC (P): difference in the deviance information criterion between the model with and without pedigree information (P-value); Fixed: significant fixed effects. Bold: PCs that are significantly correlated with DA. No heritability is significant under our simulation-based threshold.

**Table S12.** Heritability of principal components of asymmetric shape variation in humans, which represent major patterns of asymmetric variation in the sample.

|            | % var | DA $\alpha$  | $h^2$ | HPDI      | $\Delta$ DIC (P) | Fixed |
|------------|-------|--------------|-------|-----------|------------------|-------|
| <b>PC1</b> | 13.48 | <b>36.38</b> | 0.25  | 0.10-0.50 | 16.15 (0.096)    | —     |
| <b>PC2</b> | 8.80  | 81.75        | 0.29  | 0.11-0.49 | 17.86 (0.081)    | sex   |
| <b>PC3</b> | 8.08  | 78.60        | 0.23  | 0.10-0.50 | 14.65 (0.120)    | —     |
| <b>PC4</b> | 7.34  | <b>71.68</b> | 0.19  | 0.09-0.41 | 8.50 (0.274)     | —     |
| <b>PC5</b> | 5.84  | 86.28        | 0.25  | 0.08-0.44 | 10.27 (0.219)    | —     |

% var: percentage of variance explained by each principal component; DA  $\alpha$ : angle formed between each eigenvector and the directional asymmetry vector (values closer to 0° indicate a stronger relationship, and values closer to 90° indicate total dissimilarity; 78.42° is the significance threshold above which vectors are considered unrelated);  $h^2$ : heritability; HPDI: highest posterior density interval;  $\Delta$ DIC (P): difference in the deviance information criterion between the model with and without pedigree information (P-value); Fixed: significant fixed effects. Bold: PCs that are significantly correlated with DA. No heritability is significant under our simulation-based threshold.
